# Supplementary material for: Smoking, nicotine and pregnancy 2 (SNAP2) trial: protocol for a randomised controlled trial of an intervention to improve adherence to nicotine replacement therapy during pregnancy
Source: HighWire-hosted journal article supplement (doi:10.1136/bmjopen-2024-087175), 2024-05-01
Supplement: bmjopen-2024-087175supp001_data_supplement.pdf [file bmjopen-2024-087175supp001_data_supplement.pdf]

Roles and responsibilities

These membership lists are correct at the time of writing:

Roles of trial sponsor and funders

| Name              | Affiliation                          | Role                          |
|-------------------|--------------------------------------|-------------------------------|
| Alison Thorpe     | University of Nottingham ('Sponsor') | Representative of the sponsor |
| Thomas Hutchinson | NIHR ('Funder')                      | Representative of the funder  |

Trial Team

| Name                             | Affiliation               | Role                                                                         |
|----------------------------------|---------------------------|------------------------------------------------------------------------------|
| Tim Coleman                      | University of Nottingham  | Chief Investigator                                                           |
| Sue Cooper                       | University of Nottingham  | Programme lead for Workstream 3.                                             |
| Miranda Clark                    | University of Nottingham  | Senior Trial Manager, trial management oversight                             |
| Kate Bowker                      | University of Nottingham  | Trial Manager, day to day running of the trial                               |
| Lucy Phillips                    | University of Nottingham  | Trial Manager, day to day running of the trial                               |
| Karen Daykin/<br>Nicki Stockdale | University of Nottingham  | Trial Manager/Trial Coordinator, day to day running of the trial             |
| Anne Dickinson                   | University of Nottingham  | Researcher, trial intervention delivery and management of the delivery team  |
| Daniel Robertson                 | University of Nottingham  | Trial Coordinator, day to day running of the trial and participant follow up |
| Kasia Kowalewska                 | University of Nottingham  | Trial Coordinator, day to day running of the trial and participant follow up |
| Amy Morton                       | University of Nottingham  | Trial administration, participant follow up                                  |
| Eleanor Holmes                   | University of Nottingham  | Trial administration, participant follow up                                  |
| Katie Zhoya                      | University of Nottingham  | Trial administration, participant follow up                                  |
| Michelle Rawding                 | University of Nottingham  | Trial administration, participant follow up                                  |
| Daniel Simpkins                  |                           | Senior Data Manager responsible for management of the database               |
| Sarah Gardner                    | University of York        | Database design and build                                                    |
| Matthew Bailey                   | University of York        | Trial database set up and randomisation system build                         |
| Ross Thompson                    | University of Nottingham  | Researcher, participant recruitment/consent                                  |
| Lisa McDaid                      | University of East Anglia | Researcher, development of the intervention, participant recruitment/consent |
| Jo Emery                         | University of East Anglia | Researcher, development of the intervention, participant recruitment/consent |
| Felix Naughton                   | University of East Anglia | Programme lead for Workstream 1 and 2 of the NREADY programme                |

Trial Management Group

| Name                             | Affiliation              | Role                                                                        |
|----------------------------------|--------------------------|-----------------------------------------------------------------------------|
| Tim Coleman                      | University of Nottingham | Chief Investigator                                                          |
| Sue Cooper                       | University of Nottingham | Programme manager                                                           |
| Miranda Clark                    | University of Nottingham | Senior Trial Manager                                                        |
| Kate Bowker                      | University of Nottingham | Trial Manager, day to day running of the trial                              |
| Lucy Phillips                    | University of Nottingham | Trial Manager, day to day running of the trial                              |
| Karen Daykin/<br>Nicki Stockdale | University of Nottingham | Trial Manager/Trial Coordinator, day to day running of the trial            |
| Anne Dickinson                   | University of Nottingham | Researcher, trial intervention delivery and management of the delivery team |
| Ross Thomson                     | University of Nottingham | Researcher, participant recruitment/consent                                 |

|                  |                                  |                                                            |
|------------------|----------------------------------|------------------------------------------------------------|
| Catherine Hewitt | University of York               | Lead Trial statistician                                    |
| Charlie Welch    | University of York               | Trial statistician                                         |
| Gill Parkinson   | University of York               | Trial statistician                                         |
| David Torgeson   | University of York               | Director of the York Trials Unit                           |
| Michael Ussher   | St Georges, University of London | Population Health Science, and Social Marketing and Health |
| Sarah Lewis      | University of Nottingham         | Independent statistician                                   |

Trial Steering Committee

| Name              | Affiliation                                | Role                             |
|-------------------|--------------------------------------------|----------------------------------|
| Peter Hajek       | Queen Mary University London               | Independent Chair                |
| Martyn Willmore   | Public Health England                      | Independent member               |
| Jo Locker         | Public Health England                      | Independent member               |
| Donna Wilkes      | PPI                                        | Independent PPI Representative   |
| Nikki Totton      | University of Sheffield                    | Medical Independent statistician |
| Alison Thorpe     | University of Nottingham ('Sponsor')       | Observer (sponsor)               |
| Thomas Hutchinson | NIHR                                       | Observer (funder)                |
| Catherine Hewitt  | Lead Trial statistician (York Trials Unit) | Observer                         |
| Charlie Welch     | Trial statistician (York Trials Unit)      | Observer                         |
| Gill Parkinson    | Trial statistician (York Trials Unit)      | Observer                         |
| Tim Coleman       | University of Nottingham                   | Non-independent member           |
| Sue Cooper        | University of Nottingham                   | Observer                         |
| Miranda Clark     | University of Nottingham                   | Observer                         |
| Trial Manager     | University of Nottingham                   | Observer                         |
| Felix Naughton    | University of East Anglia                  | Observer                         |
